# Supplementary material for: Efficient oxygen evolution activity of CoFe-PBA heterojunctions using a bimetallic probe (Mo/Cu) at room temperature: construction of multilayered activated structures and cationic vacancies
Source: Royal Society of Chemistry journal article supplement (doi:10.1039/d4gc00863d), 2024-01-01
Supplement: d4gc00863d1.pdf [file d4gc00863d1.pdf]

# Support information

## Efficient oxygen evolution activity for heterojunctions CoFe-PBA using a bimetallic probe (Mo/Cu) at room temperature: construction of multilayered activated structural bodies and cationic vacancies

Lihai Wei<sup>1</sup>, Zhihao Liu<sup>1</sup>, Xiaodong Wu<sup>2,\*</sup>, Huabo Huang<sup>3,\*</sup>, Qianqian Jiang<sup>1,\*</sup>, Jianguo Tang<sup>1,\*</sup>

<sup>1</sup> Institute of Hybrid Materials, National Center of International Research for Hybrid Materials Technology, National Base of International Science & Technology Cooperation, College of Materials Science and Engineering, Qingdao University, Qingdao, 206000, P. R. China

<sup>2</sup> College of Materials Science and Engineering, Nanjing Tech University, Nanjing, 210009, P. R. China

<sup>3</sup> Hubei Key Laboratory of Plasma Chemistry and Advanced Materials, School of Materials Science and Engineering, Wuhan Institute of Technology, Wuhan 430205, China.

E-mail: kaiqian2008@qdu.edu.cn, wuxiaodong@njtech.edu.cn, hbhuang@wit.edu.cn and tang@qdu.edu.cn.

### 1. Experimental methods

#### 1.1 Catalyst preparation

Chemicals: ammonium molybdate tetrahydrate ((NH<sub>4</sub>)<sub>6</sub>Mo<sub>7</sub>O<sub>24</sub>•4H<sub>2</sub>O) was purchased from Sinopharm; copper chloride dihydrate (CuCl<sub>2</sub>•2H<sub>2</sub>O) was purchased from Sinopharm; cobalt hexahydrate and nitrate (Co(NO<sub>3</sub>)<sub>2</sub>•6H<sub>2</sub>O) was purchased from Aladdin; potassium ferrocyanide (K<sub>3</sub>[Fe(CN)<sub>6</sub>]) was purchased from Aladdin; trisodium citrate hexahydrate (Na<sub>3</sub>C<sub>6</sub>H<sub>5</sub>O<sub>7</sub>•2H<sub>2</sub>O) was purchased from Sinopharm .

Mo/CoFe-PBA solution: 0.08 mmol of (NH<sub>4</sub>)<sub>6</sub>Mo<sub>7</sub>O<sub>24</sub>•4H<sub>2</sub>O, 0.4 mmol of Co(NO<sub>3</sub>)<sub>2</sub>•6H<sub>2</sub>O, 0.2 mmol

of  $K_3[Fe(CN)_6]$ , and 0.4 mmol of  $Na_3C_6H_5O_7 \cdot 2H_2O$  were placed into 30 mL of deionized water with ultrasonic stirring.

Preparation of Mo/CoFe-PBA@IF 1•1.2 cm<sup>2</sup> of iron foam (IF) was immersed in the previously prepared Mo/CoFe-PBA solution for 8 hours (labeled as Test Tube 1). Remove and freeze-dry.

Cu/CoFe-PBA solution: 0.6 mmol  $CuCl_2 \cdot 2H_2O$ , 0.4 mmol  $Co(NO_3)_2 \cdot 6H_2O$ , 0.2 mmol  $K_3[Fe(CN)_6]$ , and 0.4 mmol  $Na_3C_6H_5O_7 \cdot 2H_2O$  in 30 mL of deionized water with ultrasonic stirring.

Preparation of Cu/CoFe-PBA@IF 1•1.2 cm<sup>2</sup> of iron foam (IF) was immersed in the previously prepared Cu/CoFe-PBA solution for 8 hours (labeled as Test Tube 2). Remove and freeze-dry.

CoFe-PBA configuration: 0.4 mmol  $Co(NO_3)_2 \cdot 6H_2O$ , 0.2 mmol  $K_3[Fe(CN)_6]$  and 0.4 mmol  $Na_3C_6H_5O_7 \cdot 2H_2O$  were placed in 30 ml of deionized water and sonicated.

Preparation of CoFe-PBA@IF 1•1.2 cm<sup>2</sup> of iron foam (IF) was immersed in the previously prepared CoFe-PBA solution for 8 hours (labeled as Test Tube 3). Remove and freeze-dry.

Preparation of Cu/Fe-PBA solution: 0.06 mmol  $CuCl_2 \cdot 2H_2O$ , 0.2 mmol  $K_3[Fe(CN)_6]$  and 0.4 mmol  $Na_3C_6H_5O_7 \cdot 2H_2O$  were placed in 30 ml of deionized water and sonicated.

Preparation of Cu/Fe-PBA@IF 1•1.2 cm<sup>2</sup> of iron foam (IF) was immersed in the previously prepared Cu/Fe-PBA solution for 8 hours (labeled as Test Tube 4). Remove and freeze-dry.

Preparation of Mo/Fe-PBA solution: 0.08 mmol  $(NH_4)_6Mo_7O_{24} \cdot 4H_2O$ , 0.2 mmol  $K_3[Fe(CN)_6]$  and 0.4 mmol  $Na_3C_6H_5O_7 \cdot 2H_2O$  were placed in 30 ml of deionized water and sonicated.

Preparation of Mo/Fe-PBA@IF 1•1.2 cm<sup>2</sup> of iron foam (IF) was immersed in the previously prepared Mo/Fe-PBA solution for 8 hours (labeled as Test Tube 2). Remove and freeze-dry.

## 1.2 Electrochemical measurements

Electrochemical tests were carried out using a conventional three-electrode system where Cu/CoFe-

PBA@IF and Mo/CoFe-PBA@IF with a cross-sectional area of 1 cm<sup>2</sup> were used as working electrodes, platinum was used as the counter electrode, glycerol/mercury oxide was used as the reference electrode (for electrochemical tests), and the electrolyte was a 1M KOH solution. An electrochemical workstation (CHI660E, Shanghai Chenhua Instrument Co., Ltd.) was used for instrumentation.

Electrochemical studies were performed in a standard three-electrode system with 80% IR-compensated linear scanning voltammetry (LSV) measurements at 20 mV·S<sup>-1</sup>. The Tafel slope was measured by the Tafel equation  $\eta = b \times \log(j/j_0)$ , where  $\eta$  is the 80% IR-compensated OER overpotential,  $b$  is the Tafel slope, and  $j_0$  is the exchanged current density. The EIS was studied over the frequency range of 1-100,000 Hz. The ECSA was analyzed by the CV period of the Faraday current region and the double layer capacitance ( $C_{dl}$ ) value in terms of  $ESCA = C_{dl}/C_s$ . The  $C_s$  value is 40. The overpotential ( $\eta$ ) measured by OER is based on the Nernst equation:  $E(\text{RHE})=E(\text{Hg}/\text{HgO})+0.0591 \times \text{pH}+0.098$ , and then calculated by the following equation:  $\eta=E(\text{RHE})-1.23\text{V}$ .

### 1.3 Laboratory Instruments.

Table S1 Scientific instruments and code numbers and manufacturers involved in the experimental synthesis.

| Instrument                             | Instrument Code No. | Manufacturer                               |
|----------------------------------------|---------------------|--------------------------------------------|
| electronic balance                     | FA1004B             | Shanghai Keping Instrument Co.             |
| Xiangyi High-Speed Tabletop Centrifuge | H1850R              | Changsha Xiangyi Centrifuge Instrument Co. |

|                             |          |                                          |
|-----------------------------|----------|------------------------------------------|
| Freezing vacuum drying oven | DZF      | Beijing Guangming Medical Instrument Co. |
| ultrasonic cleaner          | KQ3200DA | Kunshan Ultrasonic Instrument Co.        |
| Electrochemical workstation | CHI660E  | Shanghai Chenhua Instrument Co.          |

Table S2. Scientific instruments and code numbers and manufacturers involved in the physical and chemical characterization of experimental samples.

| Instrument                                  | Instrument Code No.    | Manufacturer                   |
|---------------------------------------------|------------------------|--------------------------------|
| Field Emission Scanning Electron Microscopy | JSM-7800F              | Nippon Electronics Corporation |
| transmission electron microscope            | JSM-2100Plus           | Nippon Electronics Corporation |
| X-ray photoelectron spectrometer            | PHI5000 Versaprobe III | Nippon Electronics Corporation |
| X-ray diffractometer                        | Ultima IV              | Japanese science               |

#### 1.4 Turnover frequency (TOF) calculations

The resulting variation of TOF versus voltage V is shown in Figure S11

The TOF ( $s^{-1}$ ) value was calculated by cyclic voltammetry (CV) measurement of the quantitative number of active sites (n). Specifically, the n value for the prepared catalyst is calculated as follows<sup>1,2</sup>:

$$n = \frac{Q}{2F} = \frac{It}{2F} = \frac{IV}{2F\mu}$$

Q is the voltammetric charge, F stands for the Faraday constant ( $C \cdot mol^{-1}$ ), I stands for the current (A), t is the time (s), V refers to the voltage (V) and  $\mu$  is the employed scan rate ( $V \cdot s^{-1}$ ). Therefore, the original formula for TOF is as follows:

$$\frac{I}{\text{TOF}} = mnF$$

where I stands for current (A) and V refers to voltage (V), so IV can be replaced by CV integral fitting area. So the formula for TOF is as follows:

$$\frac{I\mu}{\text{TOF}} = 2IV$$

### 1.5 A recent study of the comparative oxygen precipitation properties of PBA.

Table S3. Comparative studies of recent PBA oxygen precipitation properties (active substance, overpotential, tafel, and literature sources).

| Active substance      | OER overpotential (10 mA•cm <sup>-2</sup> ) | Tafel slope               | Reference    |
|-----------------------|---------------------------------------------|---------------------------|--------------|
| (Cu/CoFe-PBA@IF)      | 265 mV                                      | 50.8 mV•dec <sup>-1</sup> | this article |
| (Mo/CoFe-PBA@IF)      | 267 mV                                      | 41.6 mV•dec <sup>-1</sup> | this article |
| Fe-Co <sub>x</sub> P  | 300 mV                                      | 49 mV•dec <sup>-1</sup>   | 3            |
| CoSe <sub>2</sub> NBs | 335 mV                                      | 54.2 mV•dec <sup>-1</sup> | 4            |
| Ar-CoFe PBA           | 305 mV                                      | 36.1 mV•dec <sup>-1</sup> | 5            |
| O-PBA/N-CNT           | 280 mV                                      | 48 mV•dec <sup>-1</sup>   | 6            |
| CoNi-PBA-2            | 280 mV                                      | 63 mV•dec <sup>-1</sup>   | 7            |
| CoFeZn-PBA            | 343 mV                                      | 75 mV•dec <sup>-1</sup>   | 8            |
| CoB@300               | 290 mV                                      | 62 mV•dec <sup>-1</sup>   | 9            |
| Co/Mn-ZIF@Fe-Co-Mn    | 270 mV                                      | 78 mV•dec <sup>-1</sup>   | 10           |

## 2. Pictures of relevant test data.

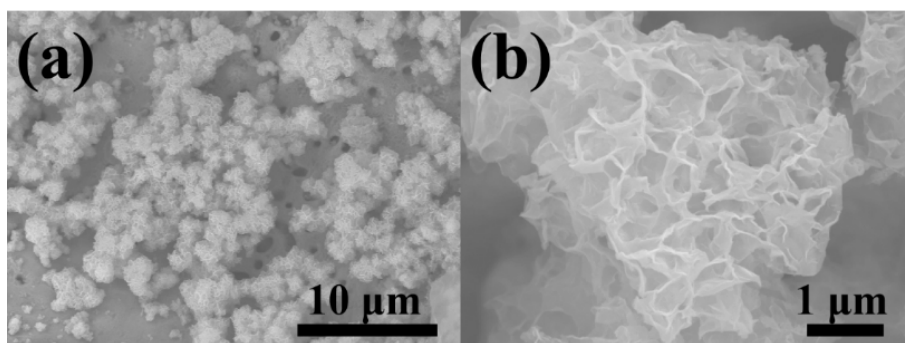

Figure S1. Mo/CoFe-PBA@IF of a) SEM image and b) individual morphology magnification.

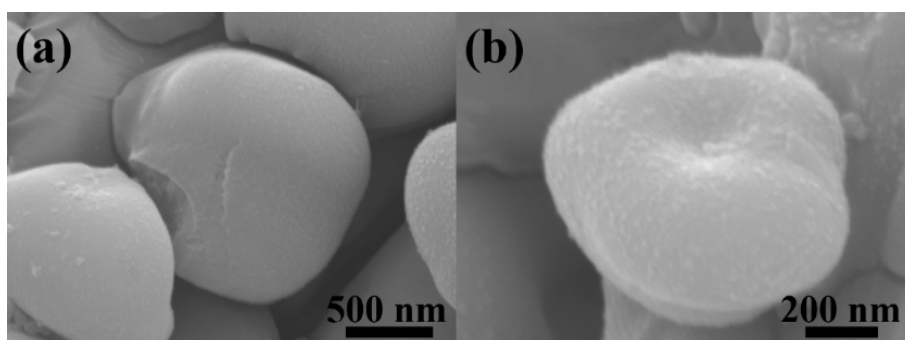

Figure S2. CoFe-PBA@IF of a) SEM image and b) individual morphology magnification.

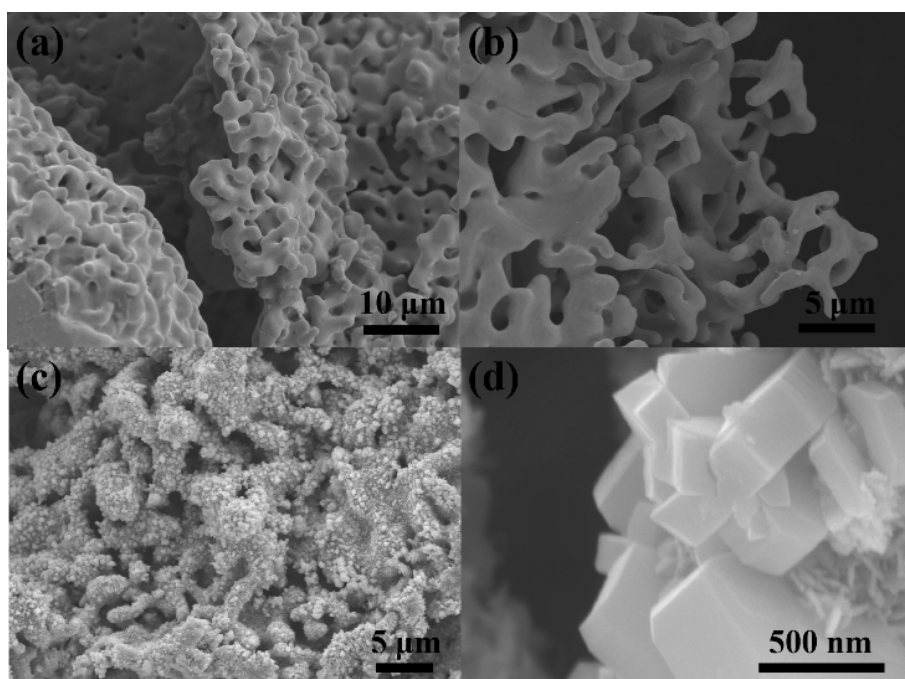

Figure S3. SEM images of (a and b) Mo/Fe-PBA@IF and (c and d) Cu/Fe-PBA@IF.

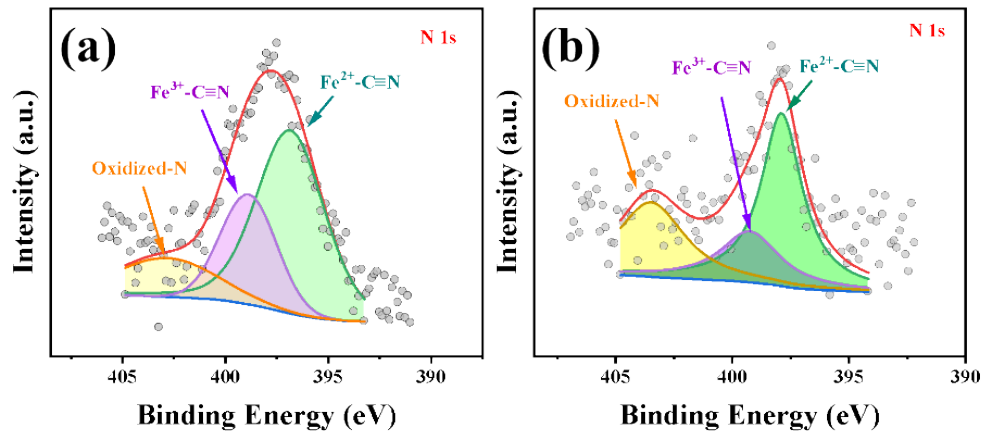

Figure S4. XPS images of a) Mo/CoFe-PBA@IF and b) N1s in Cu/CoFe-PBA@IF.

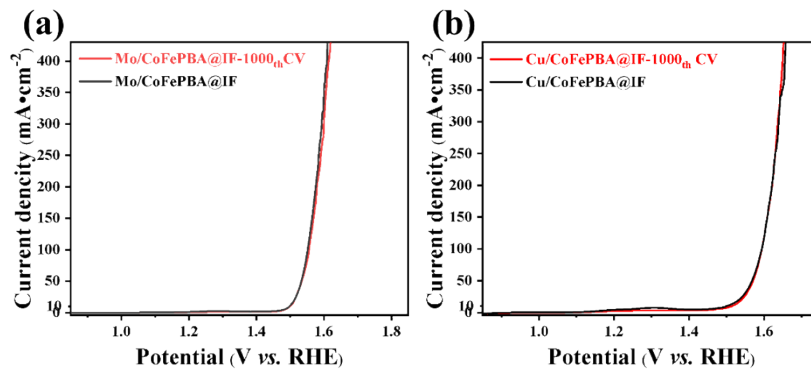

Figure S5. a) LSV images of Mo/CoFe-PBA@IF and b) Cu/CoFe-PBA@IF before and after the 1000<sup>th</sup> CV cycle.

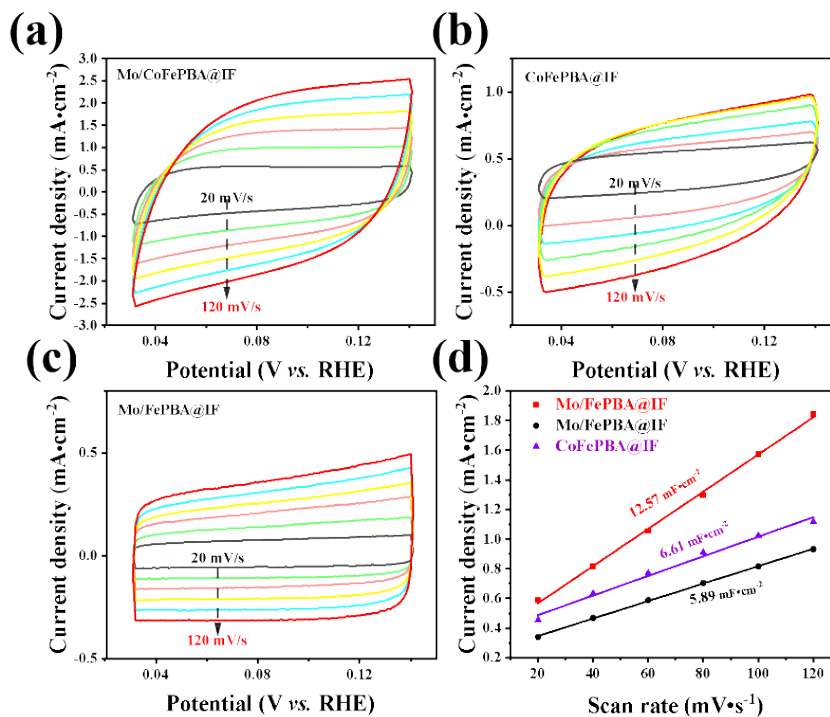

Figure S6.a) Mo/CoFe-PBA@IF, b) CoFe-PBA@IF, c) CV curves of Mo/Fe-PBA@IF at different sweep speeds and d) Capacitance current density as a function of scan rate for Mo/CoFePBA@IF, Mo/FePBA@IF, and CoFePBA@IF.

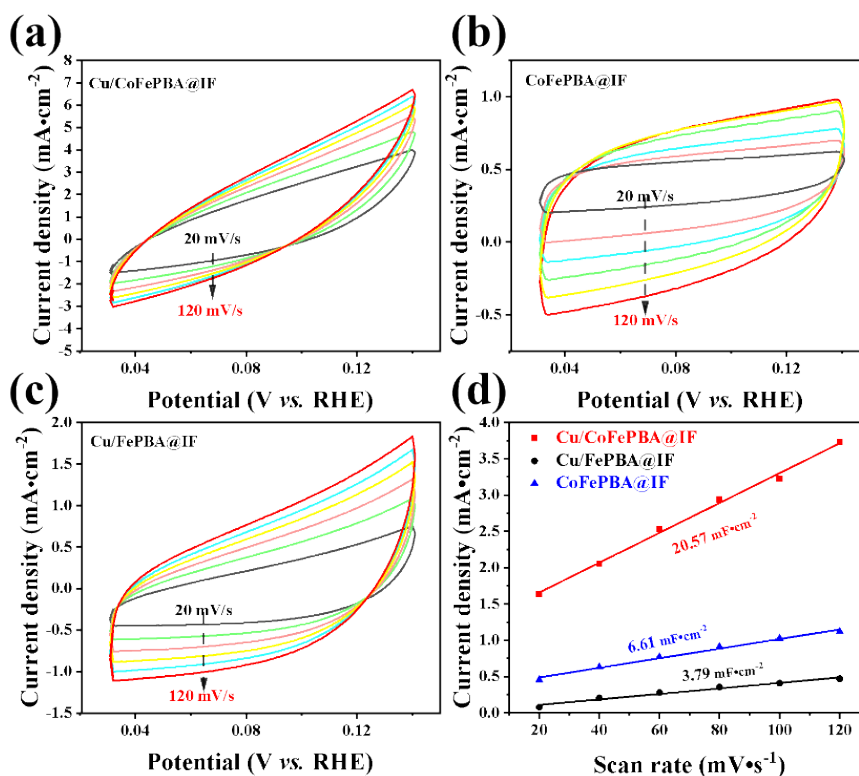

Figure S7.a) CV curves of Cu/CoFe-PBA@IF, b) CoFe-PBA@IF, c) Cu/Fe-PBA@IF at different sweep speeds and d) double layer capacitance ( $C_{dl}$ ) curves.

Table S4. Adsorption Gibbs free energy for \*OH, \*O and \*OOH intermediates and Gibbs free energy for each elementary step during OER for different kinds of structures.

|         | $\Delta G_{OH^*}$ | $\Delta G_{O^*}$ | $\Delta G_{OOH^*}$ | $\Delta G_1$ | $\Delta G_2$ | $\Delta G_3$ | $\Delta G_4$ |
|---------|-------------------|------------------|--------------------|--------------|--------------|--------------|--------------|
| Cu site | 2.089             | 4.184            | 4.870              | 2.089        | <b>2.095</b> | 0.686        | 0.049        |
| Co site | 1.555             | 2.827            | 4.627              | 1.555        | 1.272        | <b>1.800</b> | 0.292        |
| Fe site | 0.458             | 1.611            | 3.504              | 0.458        | 1.153        | <b>1.893</b> | 1.415        |



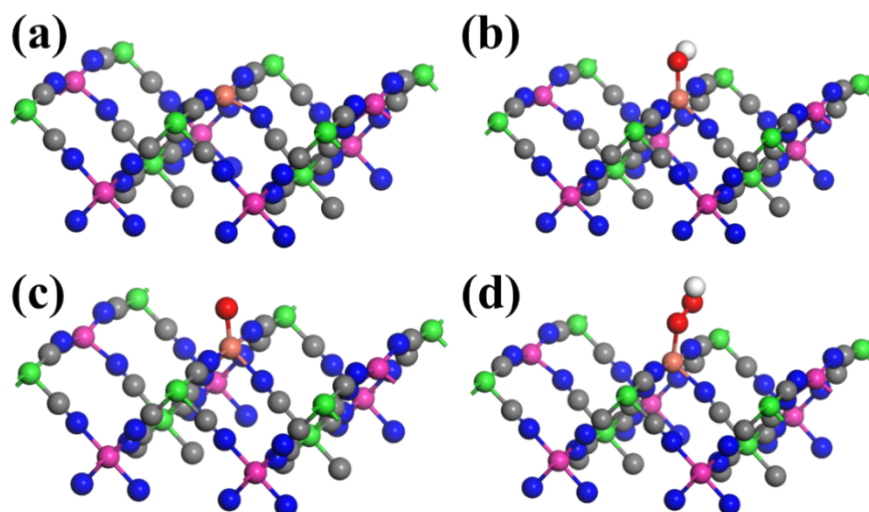

Figure S8. Adsorption of (a) Cu/CoFe-PBA@IF (4 4 0) on the surface of (b) \*OH, (c) \*O, and (d) \*OOH constructed with Cu as the active site. (Cu atoms in orange, Co atoms in pink, Fe atoms in green, C atoms in gray, N atoms in blue, and O atoms in red).

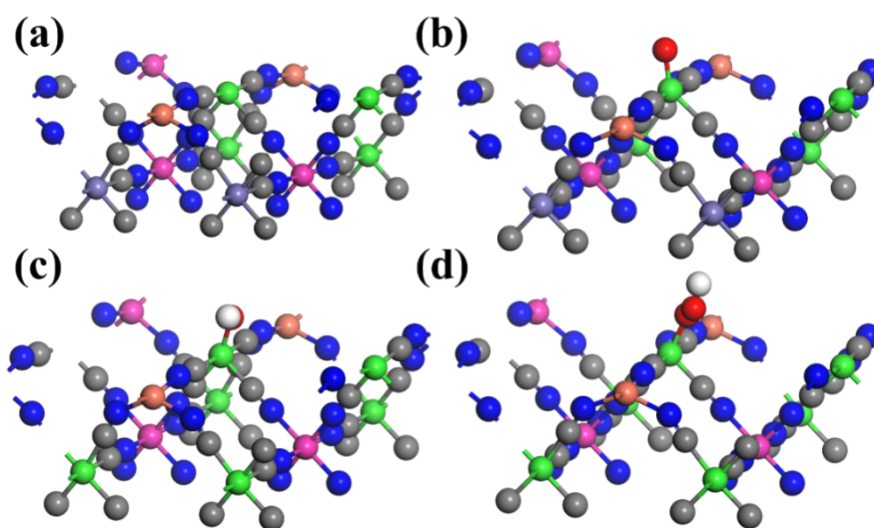

Figure S9. Adsorption of (a) Cu/CoFe-PBA@IF (4 4 0) on the surface of (b) \*OH, (c) \*O, and (d) \*OOH constructed with Fe as the active site. (Cu atoms in orange, Co atoms in pink, Fe atoms in green, C atoms in gray, N atoms in blue, and O atoms in red).

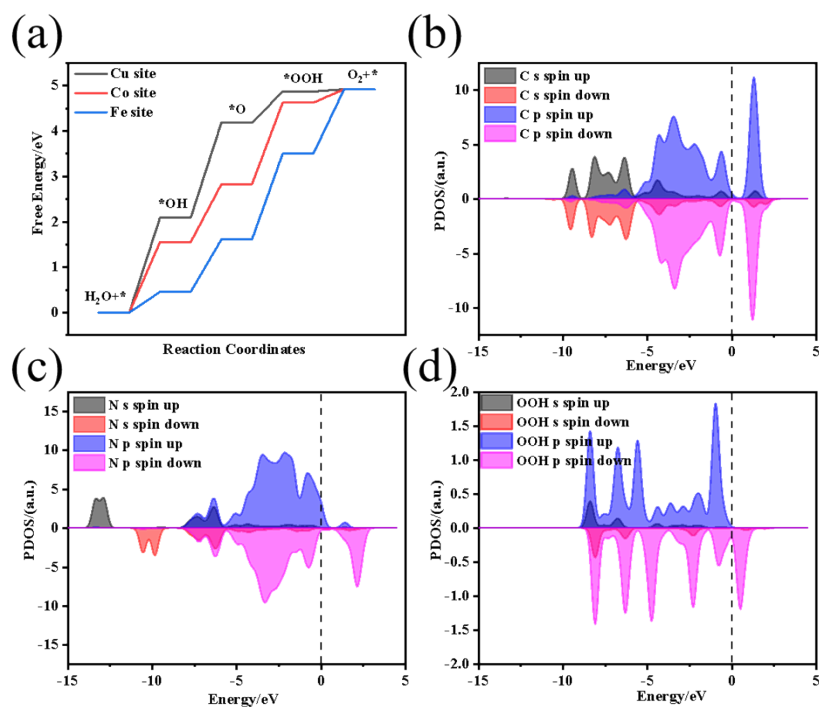

Figure S10. (a) Gibbs free energy step diagram at  $U = 0$  V; (b-d) partial density of states distributions

for C, N, and OOH.

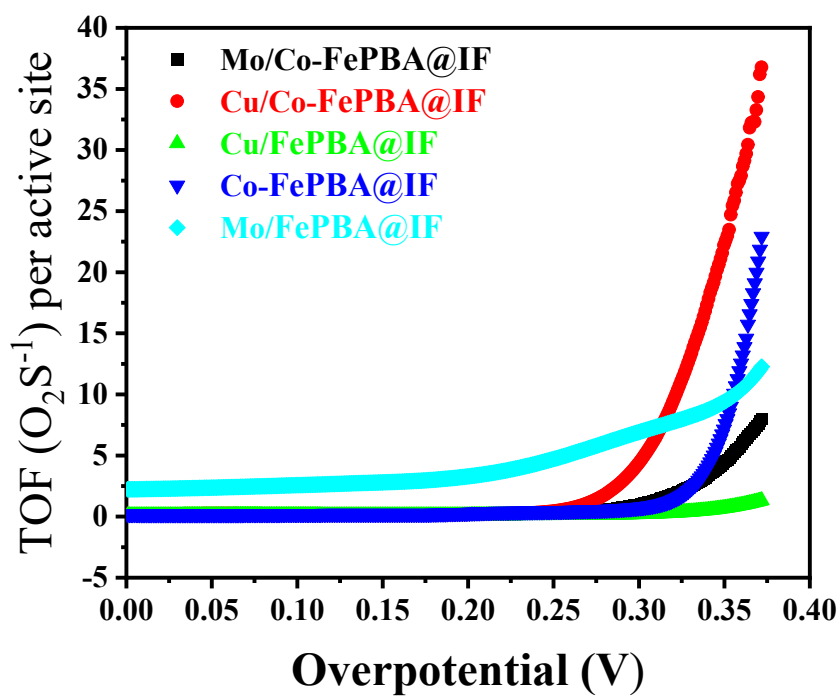

Figure S11. Transformation frequencies (TOF) of Cu/CoFe-PBA@IF, Mo/CoFe-PBA@IF, CoFe-PBA@IF, Cu/Fe-PBA@IF Mo/Fe-PBA@IF.

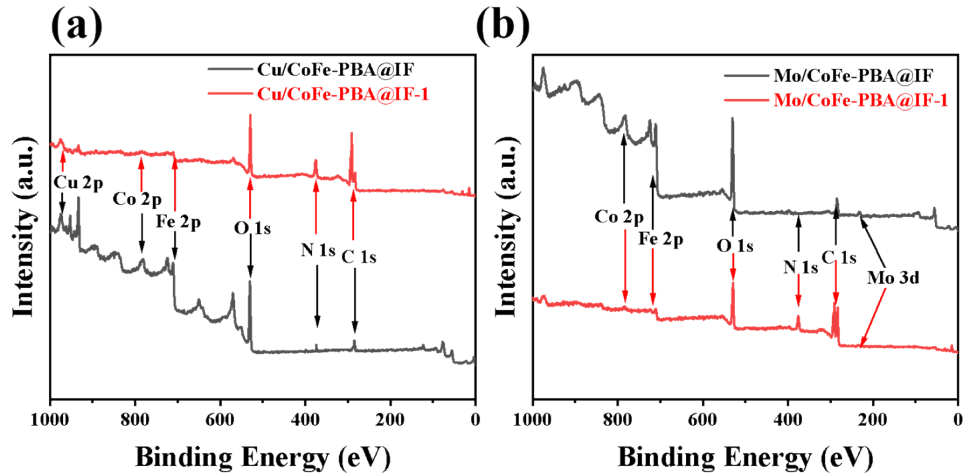

Figure S12. Full XPS spectra of (a) Cu/CoFe-PBA@IF and (b) Mo/CoFe-PBA@IF before and after the OER reaction (Cu/CoFe-PBA@IF-1 and Mo/CoFe-PBA@IF-1 represent post-reaction XPS).

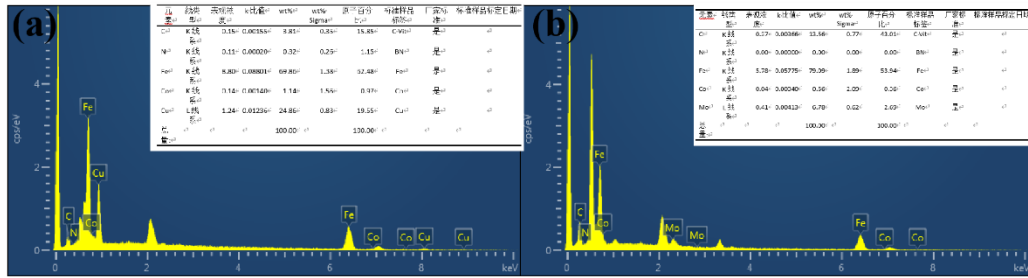

Figure S13. Elemental content concentration analyses of (a) Cu/CoFe-PBA@IF and (b) Mo/CoFe-PBA@IF (face swept).

### 3. Reference

- 1 Y. Tang, Q. Liu, L. Dong, H. B. Wu and X.-Y. Yu, *Applied Catalysis B: Environmental*, 2020, **266**, 118627.
- 2 P. Wang, J. Zhu, Z. Pu, R. Qin, C. Zhang, D. Chen, Q. Liu, D. Wu, W. Li, S. Liu, J. Xiao and S. Mu, *Applied Catalysis B: Environmental*, 2021, **296**, 120334.
- 3 W. Song, X. Teng, Y. Niu, S. Gong, X. He and Z. Chen, *Chem. Eng. J.*, 2021, **409**, 128227.
- 4 V. Ganesan and J. Kim, *Mater. Lett.*, 2018, **223**, 49-52.
- 5 F. Diao, M. Rykær Kraglund, H. Cao, X. Yan, P. Liu, C. Engelbrekt and X. Xiao, *Journal of Energy Chemistry*, 2023, **78**, 476-486.

6 S. Aulia, Y.-C. Lin, L.-Y. Chang, Y.-X. Wang, M.-H. Lin, K.-C. Ho and M.-H. Yeh, *ACS Applied Energy Materials*, 2022, **5**, 9801-9810.

7 M. Ren, J. Lei, J. Zhang, B. I. Yakobson and J. M. Tour, *ACS Appl. Mater. Interfaces*, 2021, **13**, 42715-42723.

8 H. Zou, X. Liu, K. Wang, Y. Duan, C. Wang, B. Zhang, K. Zhou, D. Yu, L.-Y. Gan and X. Zhou, *Chem. Commun.*, 2021, **57**, 8011-8014.

9 R. K. Tripathy, A. K. Samantara and J. N. Behera, *Dalton Trans.*, 2022, **51**, 2782-2788.

10 Q. Zhang, H. Wang, W. Han, L. Yang, Y. Zhang and Z. Bai, *Nano Research*, 2023, **16**, 3695-3702.
